# Supplementary material
Source: publisher figshare collection journal article supplement (https://sage.figshare.com/ndownloader/files/21240003)
Supplement: Supplementary file 1 [file 21240003]

**Box 1. List of Defined Acronyms**

|                                                                               |        |
|-------------------------------------------------------------------------------|--------|
| Complicated Grief                                                             | CG     |
| Diagnostic and Statistical Manual of Mental Disorders 5 <sup>th</sup> Edition | DSM-5  |
| International Classification of Diseases 11th Revision                        | ICD-11 |
| Post-Traumatic Stress Disorder                                                | PTSD   |
| Complicated Grief Treatment                                                   | CGT    |
| Accelerated Resolution Therapy                                                | ART    |
| Inventory of Complicated Grief                                                | ICG    |
| PTSD Checklist for DSM-5                                                      | PCL-5  |
| Psychiatric Diagnostic Screen Questionnaire                                   | PDSQ   |
| Center for Epidemiologic Studies Depression Scale                             | CESD   |
